# Supplementary material
Source: HighWire-hosted journal article supplement (https://lupus.bmj.com/content/10/1/e000898)

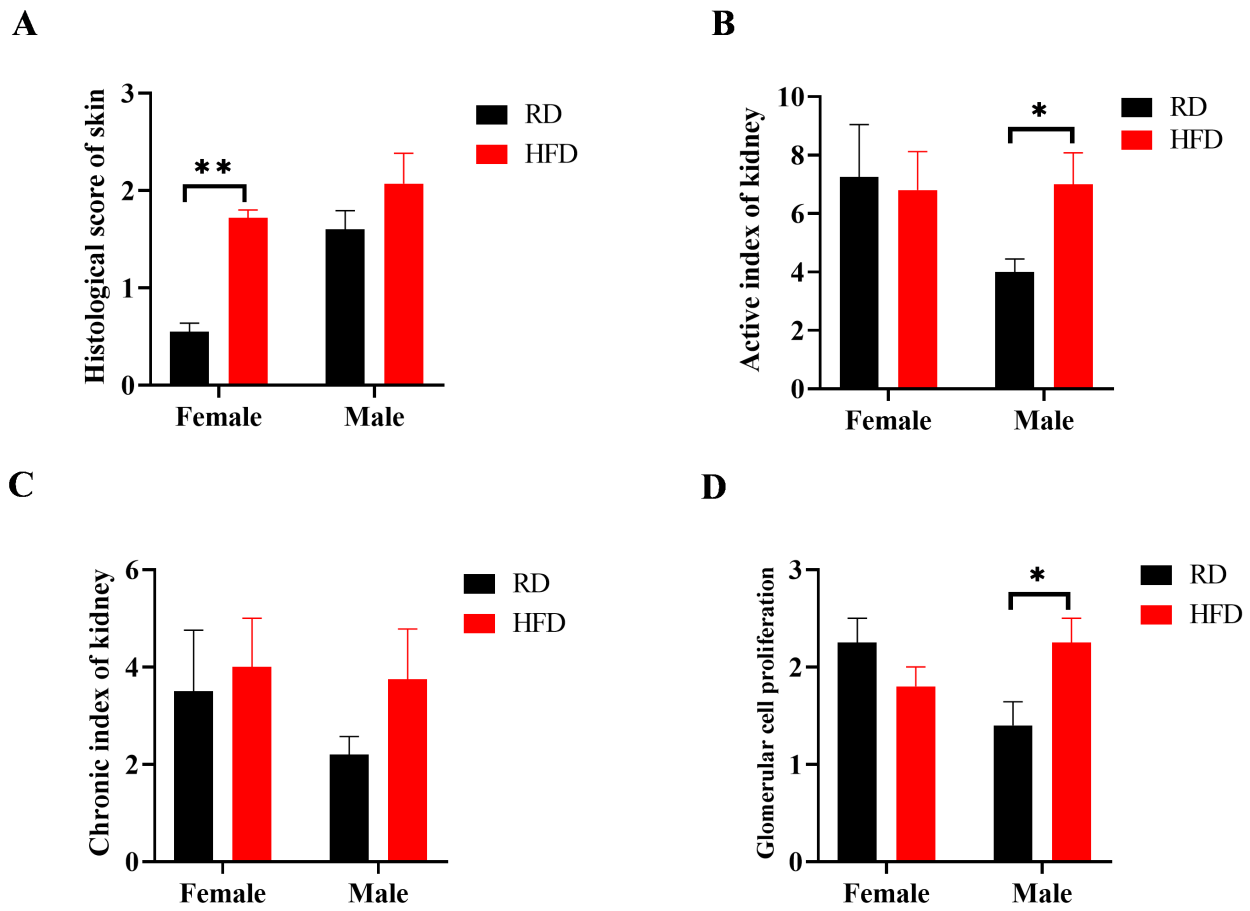

Figure 3 sup

Supplement: inline-supplementary-material-3 [file inline-supplementary-material-3.pdf]

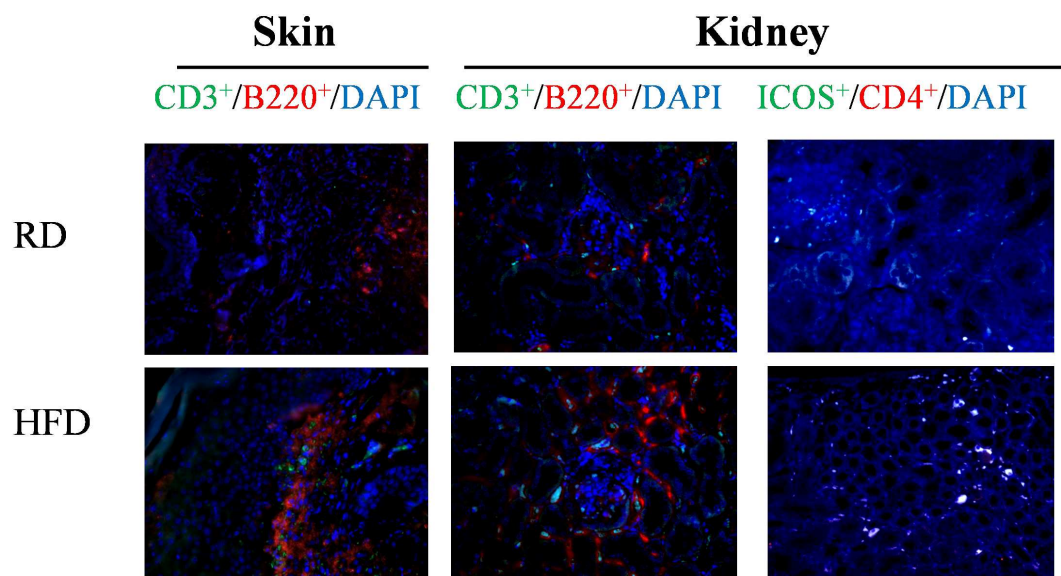

Figure 5 Sup

Supplement: inline-supplementary-material-5 [file inline-supplementary-material-5.pdf]

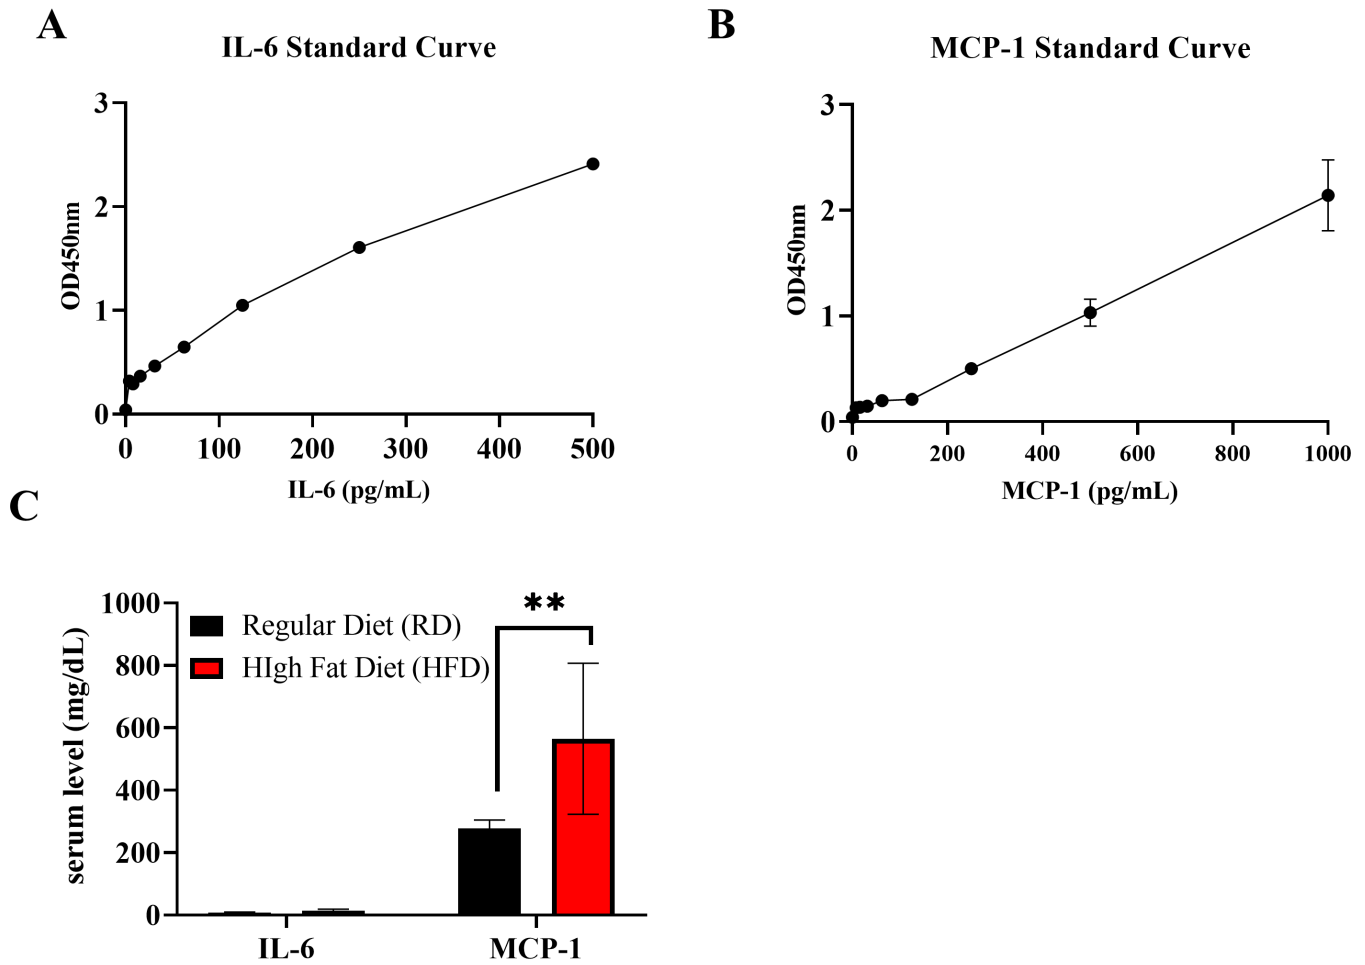

Figure 6 sup

Supplement: inline-supplementary-material-6 [file inline-supplementary-material-6.pdf]
